# Supplementary material
Source: PubMed Central journal article supplement (PMC3874124)
Supplement: NIHMS522771-supplement-Supplementary_Figure_1.pdf [file NIHMS522771-supplement-Supplementary_Figure_1.pdf]

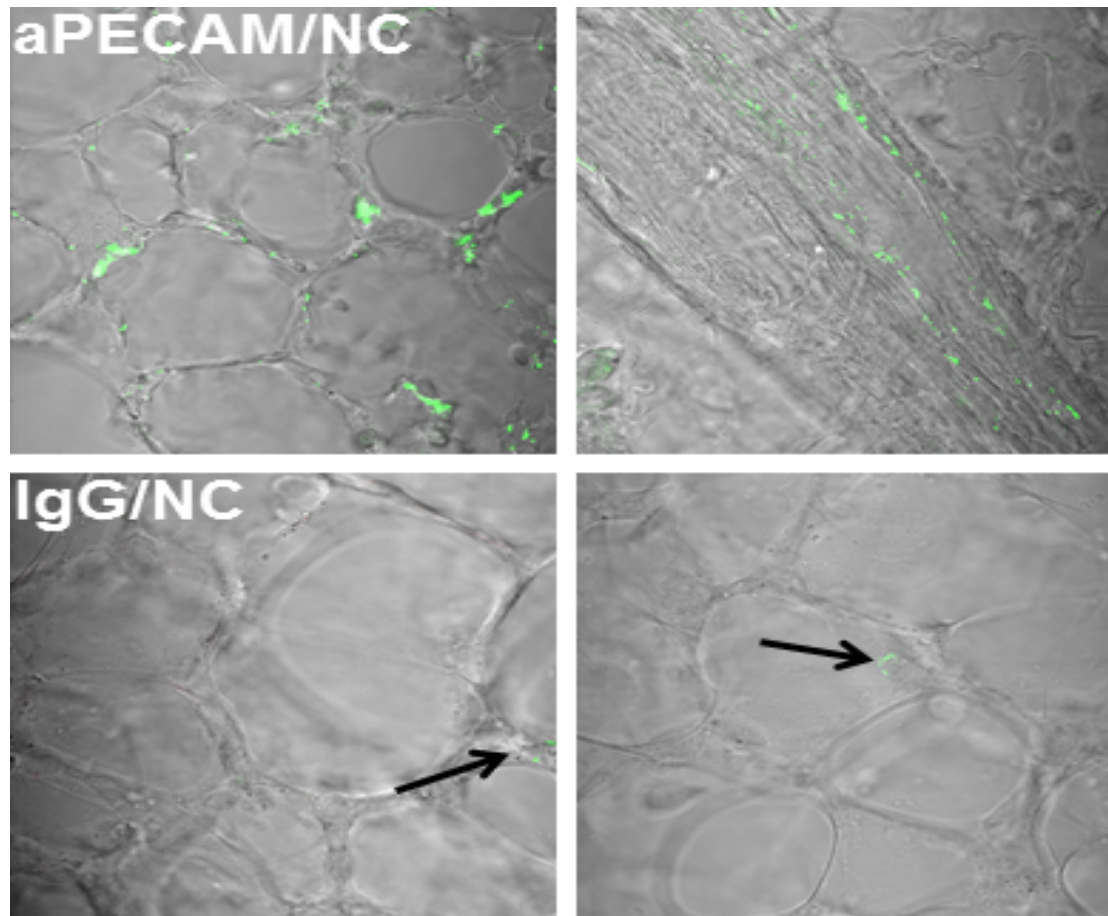

**Supplemental fig.1: Anti-PECAM/NC is specifically targeted to pulmonary endothelium *in vivo*.** Ab/NCs demonstrated markedly increased fluorescence compared to IgG/NC (30min post-IV injection) in naïve mice. Arrows in lower panels indicate the minimal amount of fluorescence due to non-specific pulmonary accumulation of untargeted particles.
